# Supplementary material for: Long-Term Simulation of Microgravity Induces Changes in Gene Expression in Breast Cancer Cells
Source: MDPI journal article supplement (doi:10.3390/ijms24021181), 2023-01-07
Supplement: s1 [file s1]

## Supplementary Figures

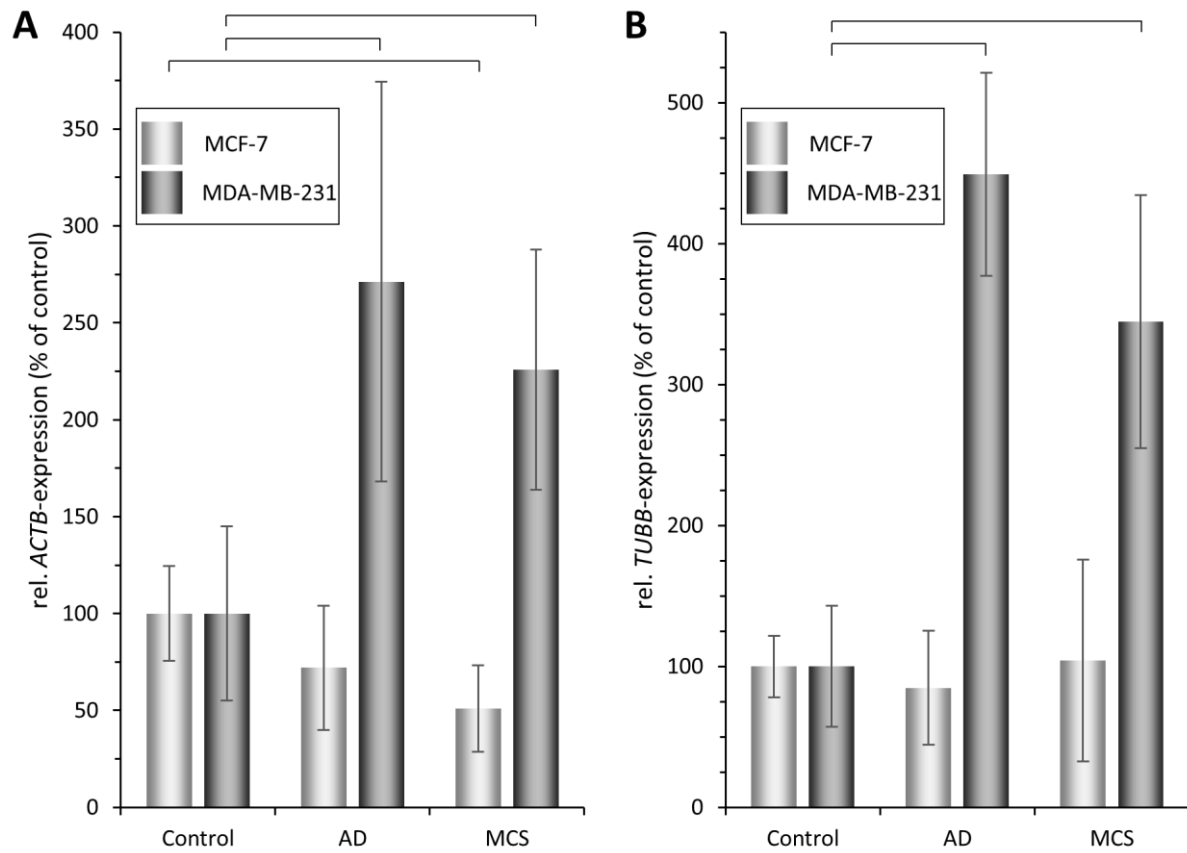

**Figure S1: qPCR analysis of cytoskeletal components**

**A:** gene expression of *ACTB*, **B:** gene expression of *TUBB*. n=5. Brackets indicate statistically significant differences with  $P < 0.05$ .



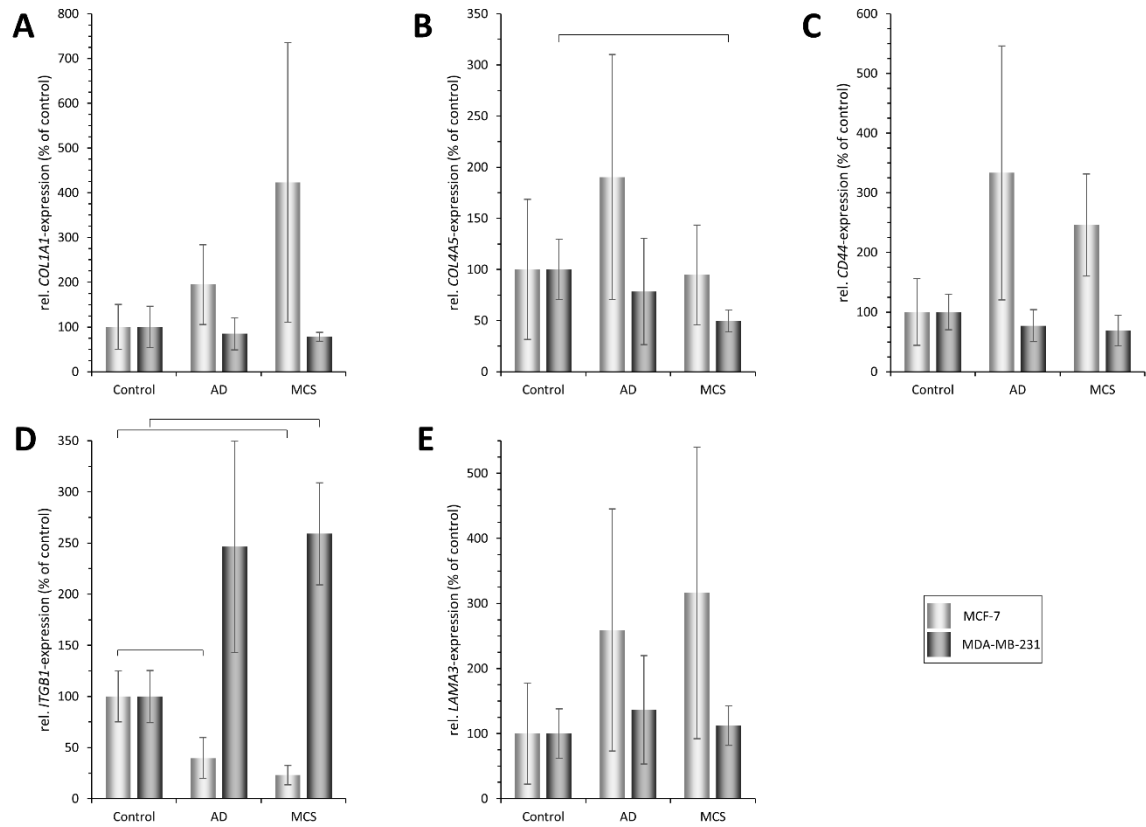

**Figure S2: Gene expression of extracellular matrix genes**

**A:** *COL1A1*, **B:** *COL4A5*, **C:** *CD44*, **D:** *ITGB1* and **E:** *LAMA3* gene expression profiles of MCF-7 and MDA-MB-231 BCC exposed to the RPM for 14d. n=5. Brackets indicate statistically significant differences with P < 0.05.



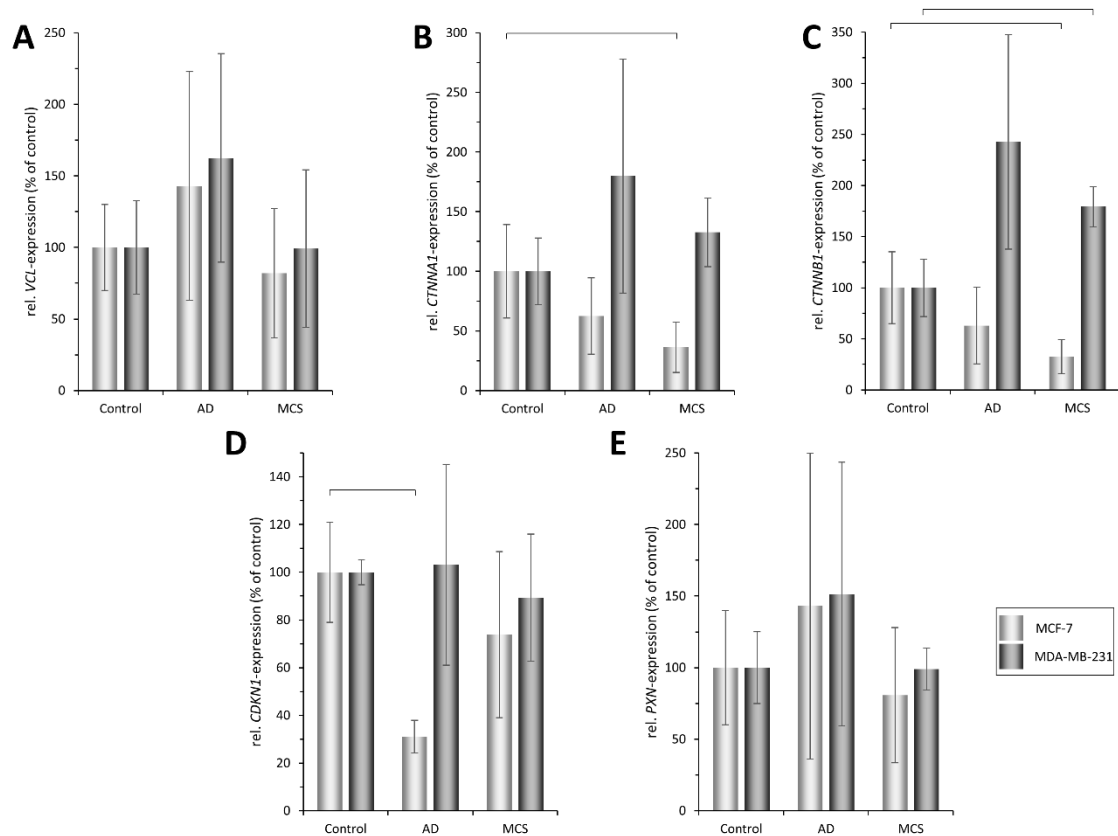

**Figure S3: Gene expression of focal adhesion molecules**

**A:** *VCL*, **B:** *CTNNA1*, **C:** *CTNNB1*, **D:** *CDKN1*, and **E:** *PXN* gene expression profiles of MCF-7 and MDA-MB-231 BCC exposed to the RPM for 14d. n=5. Brackets indicate statistically significant differences with  $P < 0.05$ .



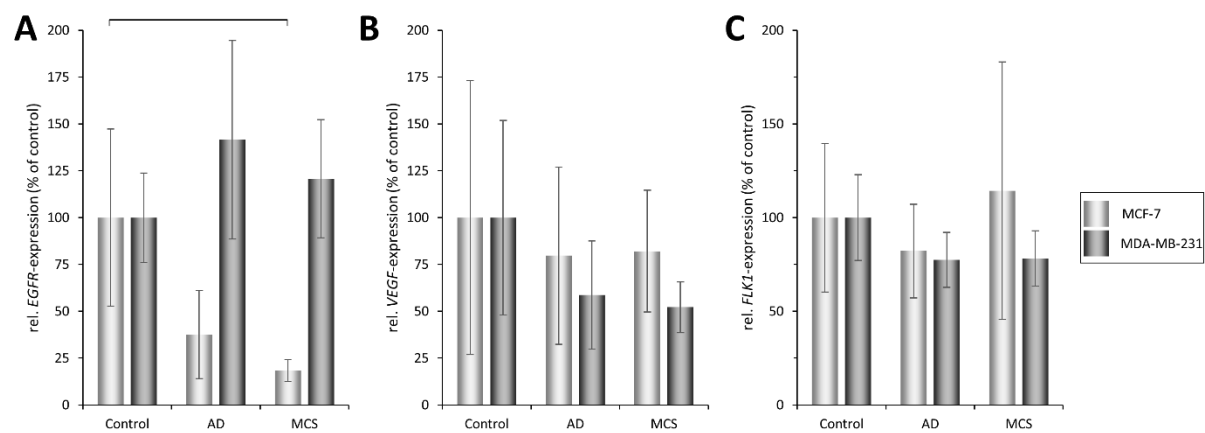

**Figure S4: Gene expression of growth factors**

**A:** *EGFR*, **B:** *VEGF*, and **C:** *FLK1* gene expression profiles of MCF-7 and MDA-MB-231 BCC exposed to the RPM for 14d. n=5. Brackets indicate statistically significant differences with  $P < 0.05$ .



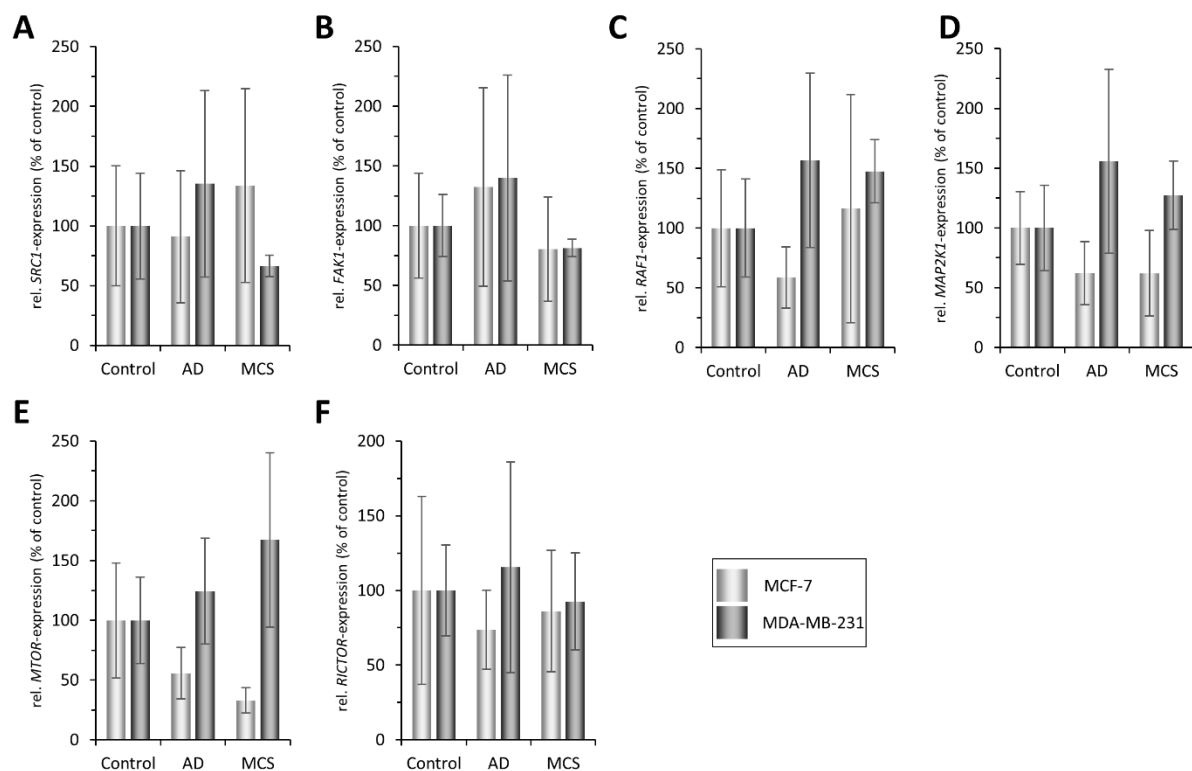

**Figure S5: Gene expression of signaling factors**

**A:** *SRC1*, **B:** *FAK1*, **C:** *RAF1*, **D:** *MAP2K1(MEK)*, **E:** *MTOR* and **F:** *RICTOR* gene expression profiles of MCF-7 and MDA-MB-231 BCC exposed to the RPM for 14d. n=5. Brackets indicate statistically significant differences with  $P < 0.05$ .



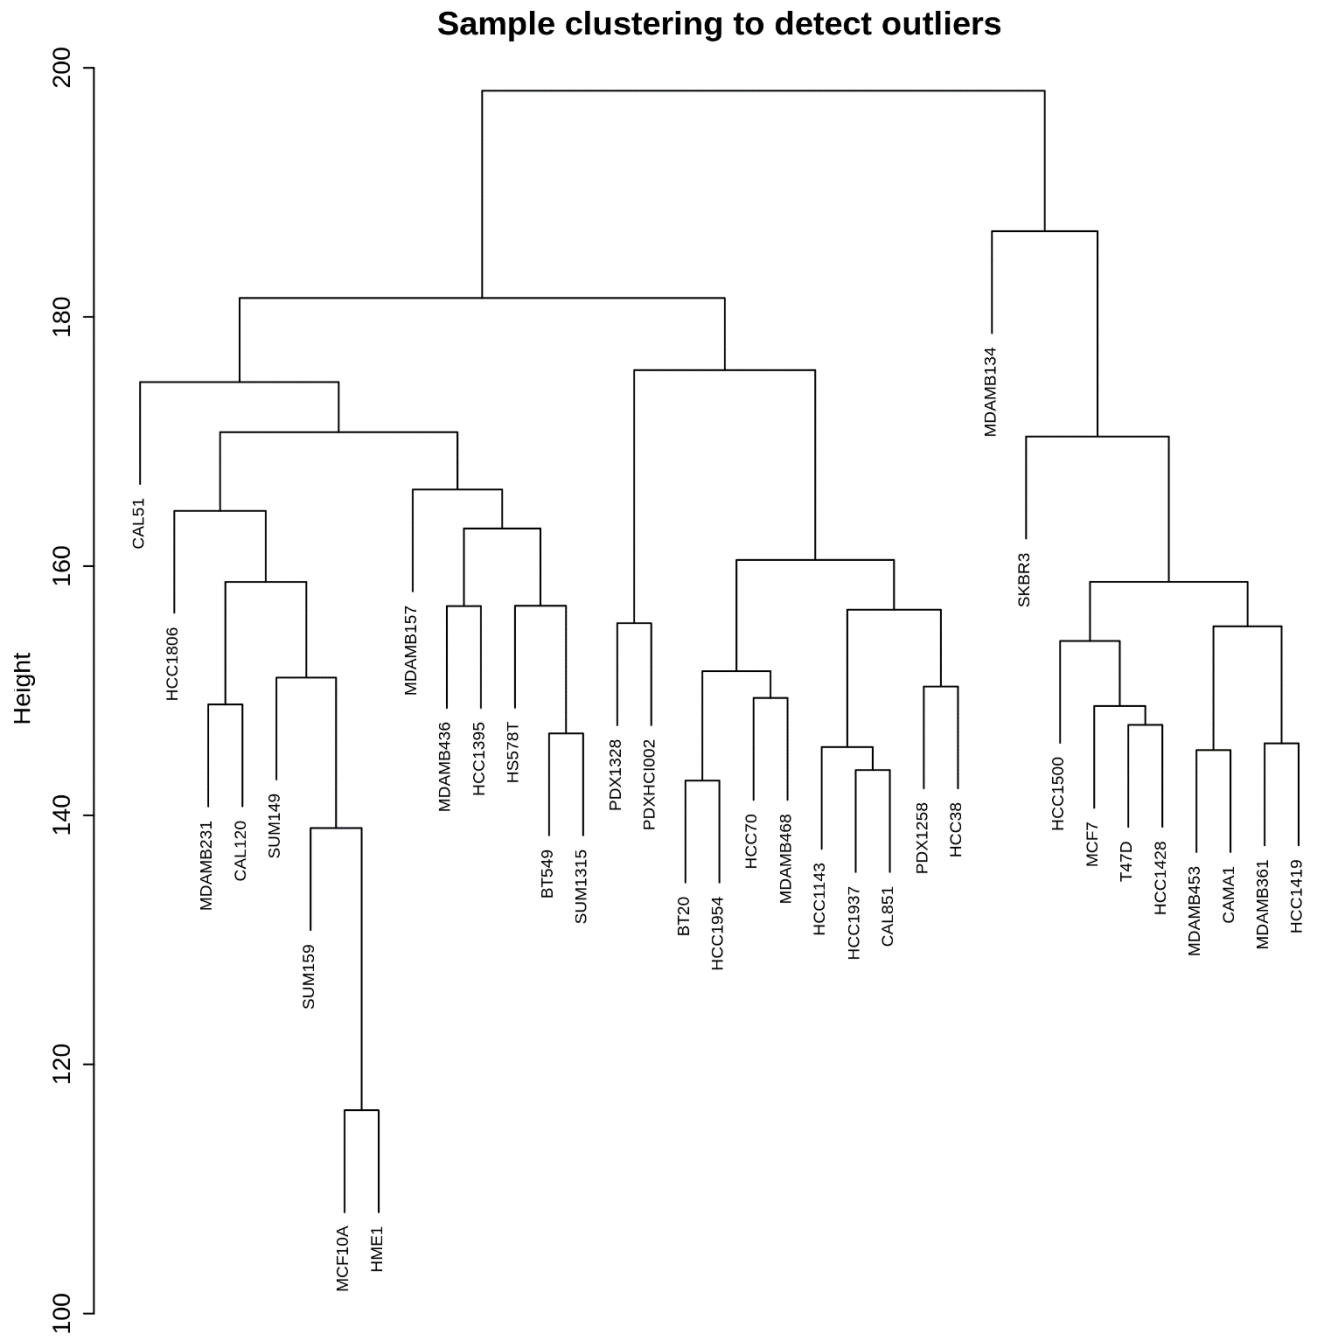

**Figure S6:** The sample cluster of the cancer cell lines.



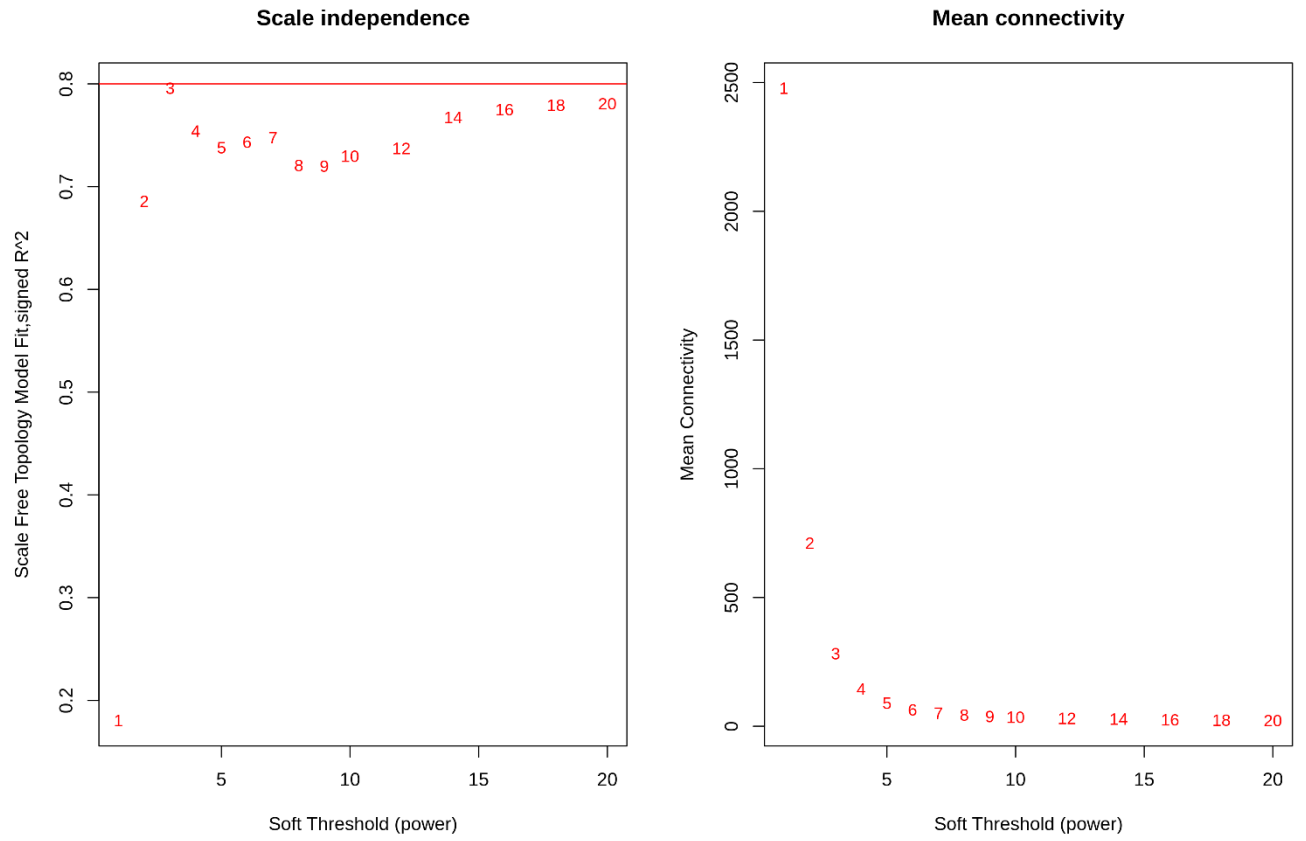

**Figure S7:** WGCNA network and module detection. Selection of the soft-thresholding powers. The left panel showed the scale-free fit index versus soft-thresholding power. The right panel displayed the mean connectivity versus soft-thresholding power.



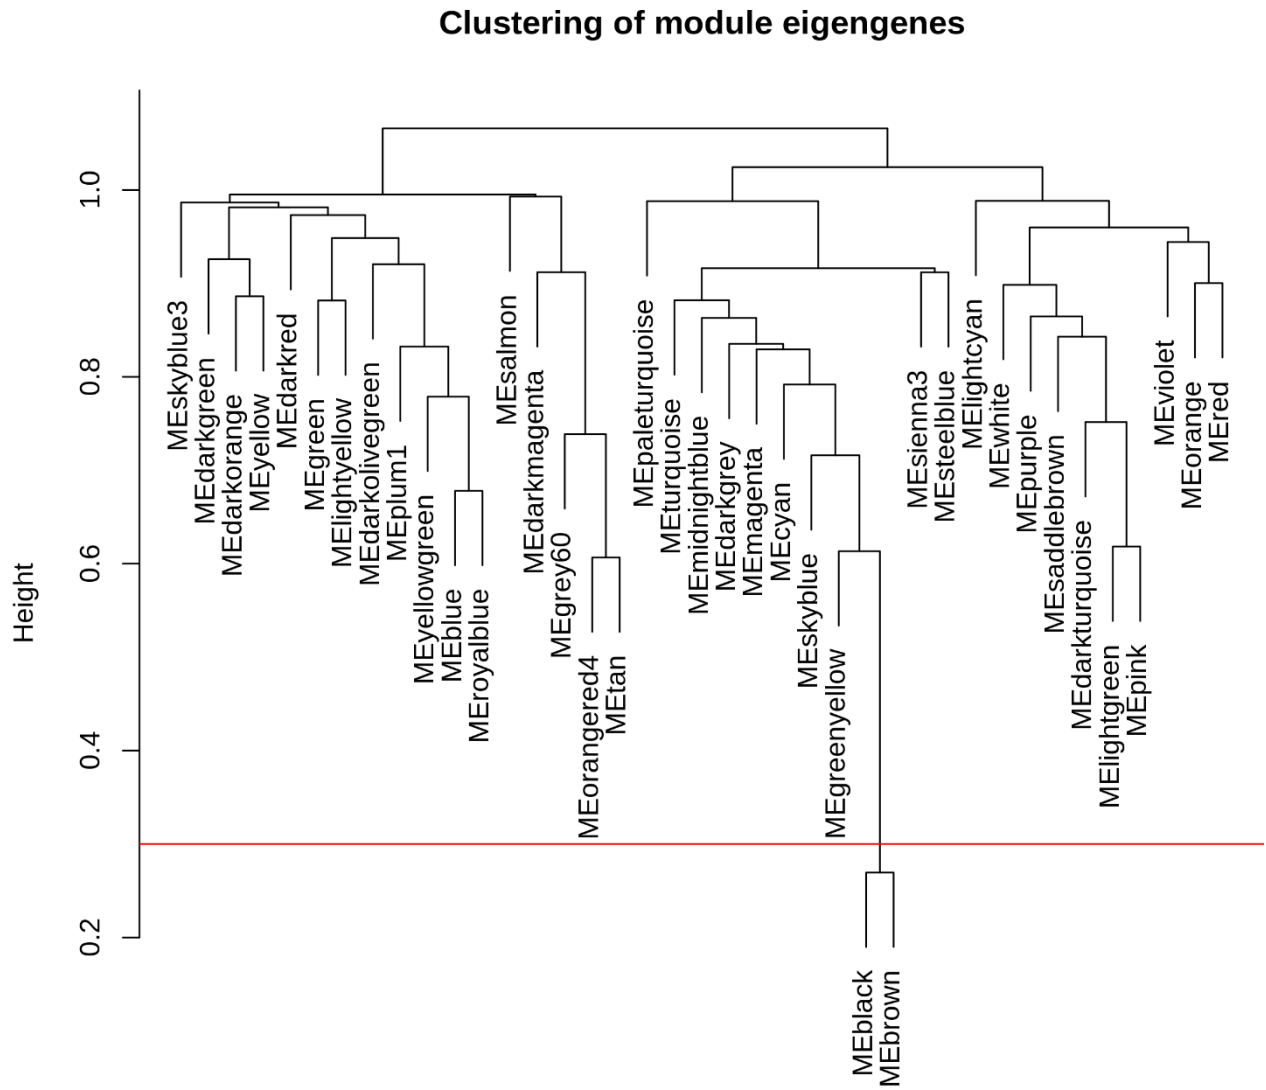

**Figure S8:** Clustering dendrogram of genes, with dissimilarity based on topological overlap, the red line indicates the cut height of 0.3, corresponding to merge correlation with 0.7.



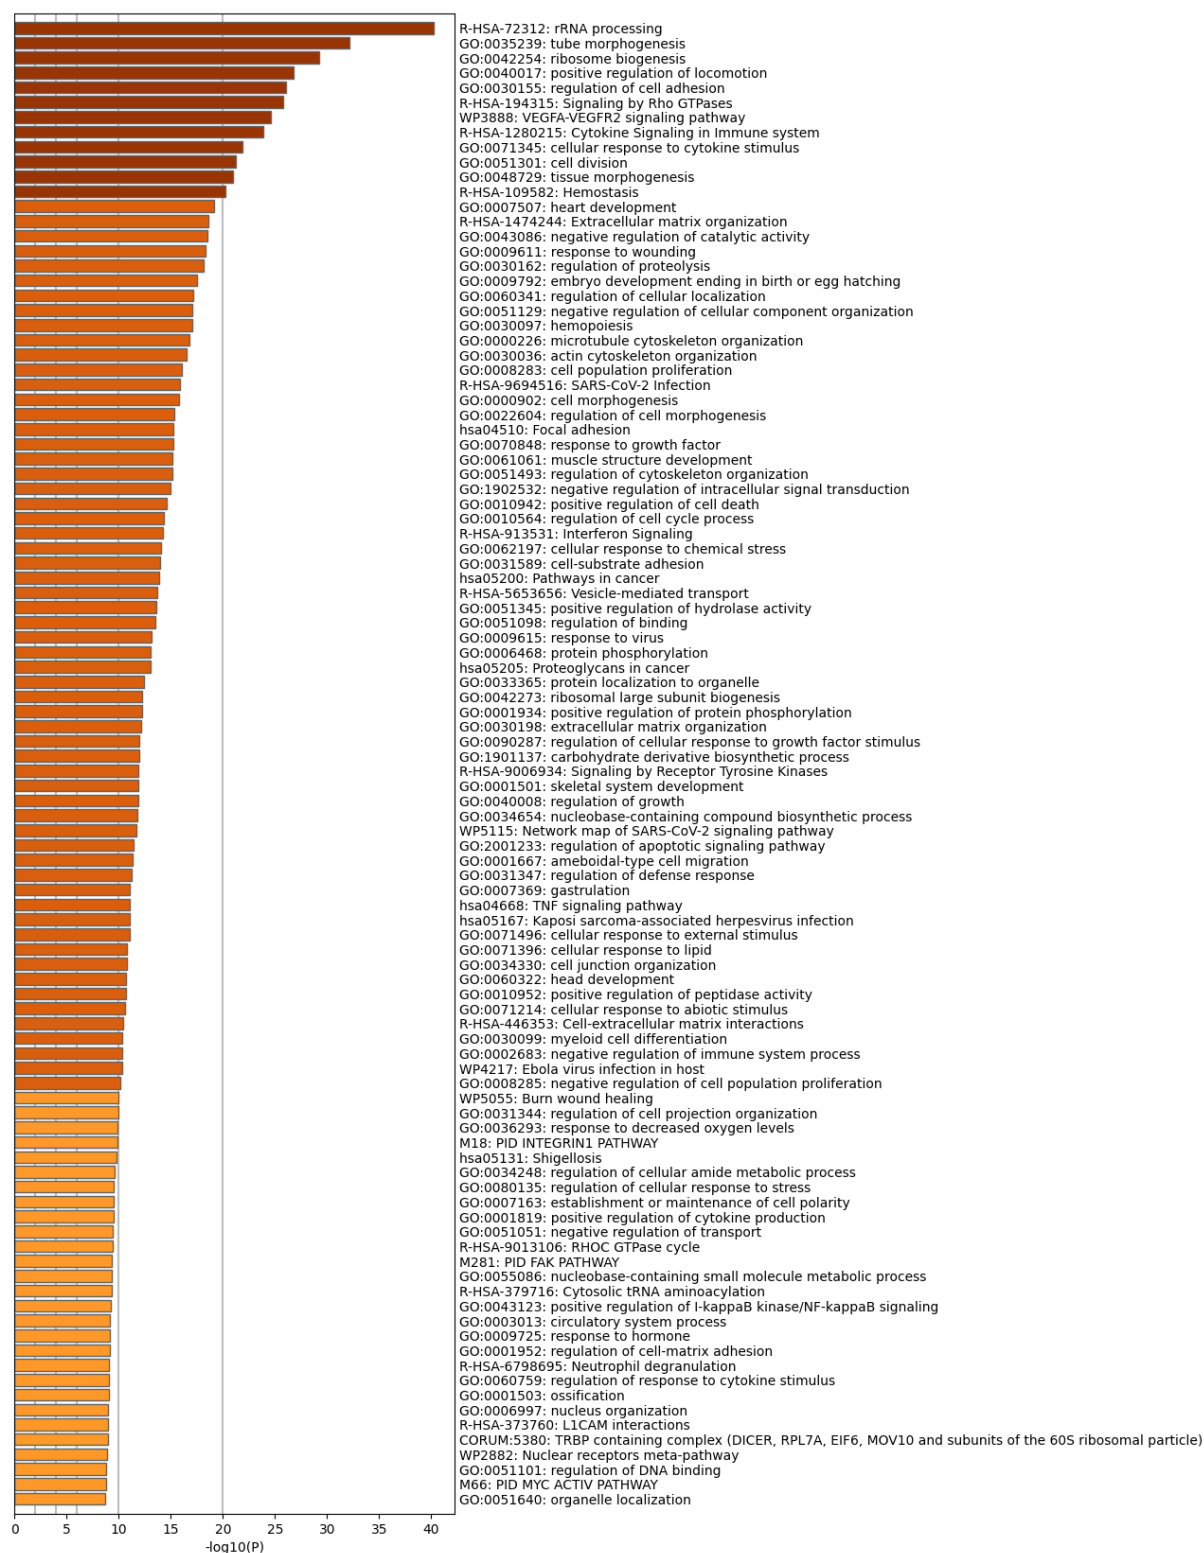

**Figure S9:** Bar graph of top 100 enriched terms across input gene lists, colored by p-values



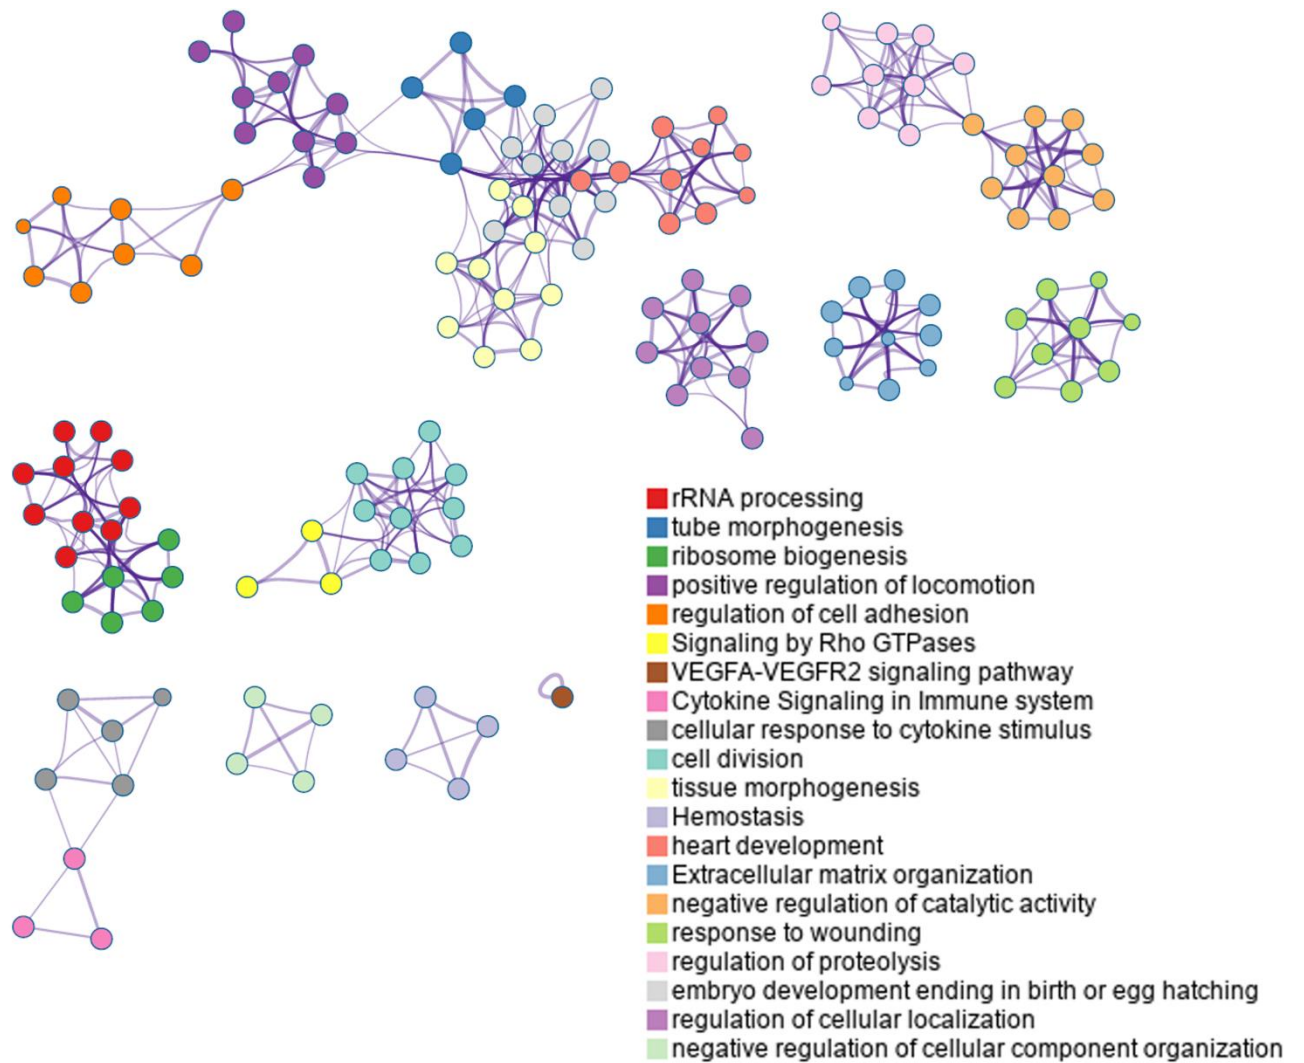

**Figure S10:** Network of enriched terms colored by cluster ID, where nodes that share the same cluster ID are typically close to each other.
